# Supplementary material
Source: PubMed Central journal article supplement (PMC4608683)
Supplement: NIHMS245951-supplement-supplement_1.pdf [file NIHMS245951-supplement-supplement_1.pdf]

### Airway Pressure Recording

Mice were anesthetized intraperitoneally with pentobarbital (80 mg/kg), and a 16-gauge cannula was placed in the trachea. Mice were ventilated with a constant tidal volume of 0.2 mL at 120 breaths/min. Decamethonium bromide (25 mg/kg) was administered into the inferior vena cava to eliminate muscle movements. Airway pressure was measured using a pressure transducer via a port in the tracheal cannula. A stable baseline was recorded for at least 2 minutes, acetylcholine (50  $\mu$ g/kg) was injected into the inferior vena cava, and the recording continued for at least 4 minutes. Airway responsiveness was defined as the time-integrated change in peak airway pressure.<sup>1</sup>

### Bronchoalveolar Lavage Fluid Preparation and Cell Differential Counts

The left mainstem bronchus was occluded using forceps, the right lung was lavaged with 0.5 mL of cold Hanks balanced salt solution (without calcium or magnesium), and the bronchoalveolar lavage fluid was collected into chilled tubes. The fluid was centrifuged, and the supernatant was transferred and stored at  $-80^{\circ}$  for cytokine measurement by means of enzyme-linked immunosorbent assay. The cell pellet was resuspended in Hanks balanced salt solution, and slides were prepared by means of centrifugation of samples at 700 rpm for 7 minutes using a cytopspin. Total cell numbers were determined using a hemocytometer. The slides were then stained with Diff-Quick (Dade Diagnostics of PR, Aguada, Puerto Rico), and cell differential counts were obtained by counting at least 500 cells per slide by means of light microscopy.

### Lung Histologic Analysis

The left lower lobe was fixed in neutral-buffered formaldehyde, and 5- $\mu$ m paraffin sections were stained with periodic acid-Schiff (PAS) for evaluation of goblet cells. Randomly chosen lung sections were examined in a blinded manner without preview. Mucus expression was calculated, adapting a previously published method,<sup>2</sup> by determining the percentage of PAS-positive epithelial cells (number of PAS-positive cells divided by the total epithelial cell number) in at least 6 randomly selected bronchioles per animal. Results are expressed as the mean percentage of PAS-positive cells per bronchiole for each group of mice. In addition, lung sections were stained with hematoxylin-eosin. Perivascular and peribronchial inflammation were graded using a standard scoring method (0=normal, 1=mild, 2=intermediate, and 3=severe).<sup>3</sup>

### Quantitative Real-time Polymerase Chain Reaction

Real-time reverse transcription quantitative polymerase chain reaction was performed using a previously published SYBR green protocol using ABI7900 HT (Applied Biosystems, Foster City, California).<sup>4</sup> Each transcript in each sample was assayed 3 times, and the median threshold cycle was used to calculate the fold change values and control changes for each gene. Three housekeeping genes were used for global normalization in each experiment ( $\beta$ -actin, RPS11, and  $\alpha$ -tubulin). Data validity by modeling of reaction efficiency and analysis of measurement precision was described previously.<sup>5</sup> Primer sequences for these reactions have been previously described.<sup>6</sup>

Table E1. Individual Herbs in MSSM-002 and Doses Used<sup>a</sup>

| Material Medica (Ping Yin) | Pharmaceutical name            | Human daily dosage of raw herb (g) | Human daily dosage of extract (g) | Mouse daily dosage of extract (mg) |
|----------------------------|--------------------------------|------------------------------------|-----------------------------------|------------------------------------|
| Bai Shao (BS)              | Radix Paeoniae Lactiflorae     | 9                                  | 1.20                              | 6.0                                |
| Da Zao (DZ)                | Fructus Zizyphi Jujubae        | 6                                  | 2.22                              | 8.5                                |
| Dang Gui (DG)              | Radix Angelicae sinensis       | 9                                  | 4.62                              | 17.9                               |
| Gan Cao (GC)               | Radix Glycyrrhizae Uralensis   | 3                                  | 0.56                              | 2.2                                |
| Ge Gen (GG)                | Radix Puerariae                | 9                                  | 1.89                              | 7.3                                |
| Huang Qin (HQ)             | Radix Scutellariae baicalensis | 9                                  | 2.05                              | 7.9                                |
| Jie Geng (JG)              | Radix Platycodi grandiflori    | 6                                  | 3.16                              | 12.2                               |
| Ku Shen (KS)               | Radix Sophorae Flavescentis    | 9                                  | 1.38                              | 5.4                                |
| Ling Zhi (LZ)              | Ganoderma                      | 20                                 | 4.2                               | 4.2                                |
| Sheng Jiang (SJ)           | Rhizoma Zingiberis             | 6                                  | 0.39                              | 1.5                                |
| Ting Li Zi (TLZ)           | Semen Descurainiae seupleidii  | 9                                  | 0.82                              | 3.2                                |
| Xing Ren (XR)              | Semen Pruni armeniaca          | 9                                  | 1.03                              | 3.9                                |
| Zi Su                      | Folium Perillae Frutescentis   | 9                                  | 4.63                              | 9.0                                |
| Zhen Zhu Mu (ZZM)          | Concha Margaritifera           | 15                                 | 0.25                              | 0.5                                |
| ASHMI                      |                                | 32                                 | 3.6                               | 9.5                                |
| MSSM-002                   |                                | 128                                | 19.4                              | 73.4                               |

<sup>a</sup> MSSM-002 is composed of 14 herbs, which are listed in Ping Yin and by pharmaceutical name. The doses of formulas for MSSM-002 and ASHMI are also listed.

Table E2. Effects of Individual Herbs of MSSM-002 on AHR and Eosinophilic Lung Inflammation

| Herbs    | % of APTI reduction Vs Sham* | % of Eosinophil reduction Vs Sham* |
|----------|------------------------------|------------------------------------|
| DZ       | -43.97                       | -58.69                             |
| ZZM      | -30.65                       | 23.07                              |
| GC       | -13.5%                       | 17.3                               |
| DG       | -10.10                       | 58.26                              |
| SZ       | 0.90                         | -1.12                              |
| XR       | 25.69                        | 33.27                              |
| SJ       | 19.57                        | 31.17                              |
| BG       | 20.62                        | 51                                 |
| LZ       | 26.00                        | 63.76                              |
| HQ       | 30.6                         | 22.12                              |
| TLZ      | 31.55                        | 4.27                               |
| JG       | 39.95                        | 30.88                              |
| GG       | 43.43                        | 41.94                              |
| KS       | 52.12                        | 31.12                              |
| MSSM-002 | 58.14                        | 47.65                              |
| ASHMI    | 60                           | 63                                 |

Abbreviations: AHR, airway hyperresponsiveness; APTI, time-integrated change in peak airway pressure; BG, Bai-Sao and Gan-Cao (commonly used as a pair in traditional Chinese medicine).

Antigen-sensitized and antigen-challenged mice were treated with individual herbs of the MSSM-002 formula or with the entire formula. Percentage reduction in APTI (a measure of AHR) and bronchoalveolar lavage fluid eosinophils were calculated based on the values of nontreated antigen-sensitized and antigen-challenged mice (conalbumin mice). A minimum of 4 mice were included in each group. Minus indicates an increase in APTI or eosinophil percentage vs nontreated conalbumin mice. Complete herbal names are listed in Table E1.

\* APTI values in treated conalbumin mice were not normalized by subtracting the APTI values in naive mice.

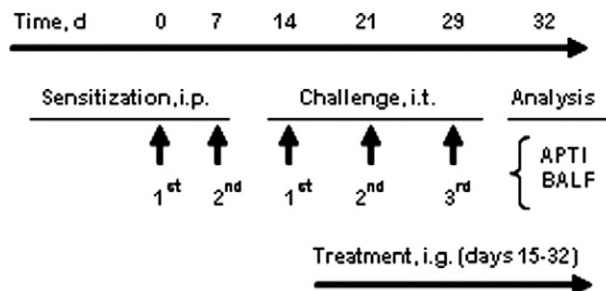

Figure E1. Experimental protocol. AKR mice (6 weeks old) were sensitized intraperitoneally (i.p) with concanavalin A (200  $\mu$ g per mouse) twice at weekly intervals and then were challenged intratracheally (i.t.) on days 14, 21, and 29 with concanavalin A (100  $\mu$ g per mouse). Twenty-four hours after the first challenge, mice were treated with 1 of the 14 herbs in MSSM-002 or with complete MSSM-002, all delivered at a dose of 1 mL per mouse intragastrically (i.g.) twice daily for 18 days. Nontreated antigen-sensitized and antigen-challenged mice and naive mice served as controls. Seventy-two hours after the final ovalbumin challenge, mice were humanely killed for analysis. APTI indicates time-integrated change in peak airway pressure; and BALF, bronchoalveolar lavage fluid.

## REFERENCES

- Li XM, Chopra RK, Chou TY, Schofield BH, Wills-Karp M, Huang SK. Mucosal IFN- $\gamma$  gene transfer inhibits pulmonary allergic responses in mice. *J Immunol.* 1996;157:3216-3219.
- Cho JY, Miller M, Baek KJ, et al. Immunostimulatory DNA sequences inhibit respiratory syncytial viral load, airway inflammation, and mucus secretion. *J Allergy Clin Immunol.* 2001;108:697-702.
- Bachelet I, Munitz A, Levi-Schaffer F. Abrogation of allergic reactions by a bispecific antibody fragment linking IgE to CD300a. *J Allergy Clin Immunol.* 2006;117:1314-1320.
- Yuen T, Wurmbach E, Pfeffer RL, Ebersole BJ, Sealfon SC. Accuracy and calibration of commercial oligonucleotide and custom cDNA microarrays. *Nucleic Acids Res.* 2002;30:e48.
- Gonzalez-Maeso J, Yuen T, Ebersole BJ, et al. Transcriptome fingerprints distinguish hallucinogenic and nonhallucinogenic 5-hydroxytryptamine 2A receptor agonist effects in mouse somatosensory cortex. *J Neurosci.* 2003;23:8836-8843.
- Busse PJ, Zhang TF, Srivastava K, Schofield B, Li XM. Effect of ageing on pulmonary inflammation, airway hyperresponsiveness and T and B cell responses in antigen-sensitized and -challenged mice. *Clin Exp Allergy.* 2007;37:1392-1403.
